# Supplementary material for: Prevalence and Motivators of Getting a COVID-19 Booster Vaccine in Canada: Results from the iCARE Study
Source: MDPI journal article supplement (doi:10.3390/vaccines11020291), 2023-01-28
Supplement: s1 [file s1]

**Supplementary Table S1.** Participant characteristics of the overall sample

|                                       | Survey 9<br>(Jan. 21 -Feb 4, 2022)<br>(N=3001)<br>% (N) |
|---------------------------------------|---------------------------------------------------------|
| <b>Sex</b>                            |                                                         |
| <i>Male</i>                           | 48.4 (1446)                                             |
| <i>Female</i>                         | 51.6 (1543)                                             |
| <i>Missing values</i>                 | 12                                                      |
| <b>Age</b>                            |                                                         |
| <i>Less than or equal to 25 years</i> | 12.5 (371)                                              |
| <i>26-50 years</i>                    | 40.3 (1197)                                             |
| <i>51 years or more</i>               | 47.2 (1402)                                             |
| <i>Missing values</i>                 | 31                                                      |
| <b>Education level</b>                |                                                         |
| <i>High school diploma and less</i>   | 72.6 (2159)                                             |
| <i>Cegep and more</i>                 | 27.4 (816)                                              |
| <i>Missing values</i>                 | 26                                                      |
| <b>Income</b>                         |                                                         |
| <i>Less than 60K</i>                  | 46.8 (1251)                                             |
| <i>60K and more</i>                   | 45.2 (1423)                                             |
| <i>Missing values</i>                 | 327                                                     |
| <b>Chronic Disease</b>                |                                                         |
| <i>No</i>                             | 54.8 (1593)                                             |
| <i>At least one chronic disease</i>   | 45.2 (1316)                                             |
| <i>Missing values</i>                 | 92                                                      |
| <b>Depressive Disorder</b>            |                                                         |
| <i>Yes</i>                            | 18.4 (539)                                              |
| <i>No</i>                             | 81.6 (23880)                                            |
| <i>Missing values</i>                 | 74                                                      |
| <b>Anxiety Disorder</b>               |                                                         |
| <i>Yes</i>                            | 23.0 (671)                                              |
| <i>No</i>                             | 77.0 (2250)                                             |
| <i>Missing values</i>                 | 80                                                      |
| <b>Parent</b>                         |                                                         |
| <i>No</i>                             | 78.8 (2304)                                             |
| <i>Yes</i>                            | 21.2 (621)                                              |
| <i>Missing values</i>                 | 76                                                      |
| <b>Healthcare Worker</b>              |                                                         |
| <i>No</i>                             | 95.3 (2783)                                             |
| <i>Yes</i>                            | 4.7 (136)                                               |

|                                                 |             |
|-------------------------------------------------|-------------|
| <i>Missing values</i>                           | 82          |
| <b>Essential Worker</b>                         |             |
| <i>No</i>                                       | 80.1 (2344) |
| <i>Yes</i>                                      | 19.9 (582)  |
| <i>Missing values</i>                           | 75          |
| <b>Infected with COVID-19</b>                   |             |
| <i>Yes</i>                                      | 78.4 (2167) |
| <i>No</i>                                       | 21.6 (598)  |
| <i>Missing values</i>                           | 236         |
| <b>Received a COVID-19 vaccine booster dose</b> |             |
| <i>Yes</i>                                      | 67.0 (1744) |
| <i>No</i>                                       | 33.0 (859)  |
| <i>Missing values</i>                           | 398         |

**Supplementary Table S2.** Frequencies of motivators «to a great extent» as a function of booster vaccination status

|                                                                                                            | Not boosted<br>(N=859) | Boosted<br>(N=1744) |
|------------------------------------------------------------------------------------------------------------|------------------------|---------------------|
| Motivators                                                                                                 | % (N)                  | % (N)               |
| Trusting the company who developed the booster                                                             | 32.3 (259)             | 44.1 (752)          |
| Having information that the booster is safe and unlikely to have any serious short-term side effects       | 41.6 (337)             | 55.7 (957)          |
| Having information that the booster is safe and unlikely to have any serious long-term side effects        | 44.2 (360)             | 56.6 (972)          |
| Having information that the booster is effective                                                           | 44.8 (365)             | 64.8 (1118)         |
| Believing that I am high risk of getting infected with COVID-19                                            | 25.4 (197)             | 30.3 (502)          |
| Hearing that other people have positive attitudes towards the booster                                      | 20.3 (163)             | 30.4 (516)          |
| Seeing more people getting the booster                                                                     | 18.9 (153)             | 29.4 (502)          |
| Learning that getting the booster would allow me to go to restaurants/bars, attend public events or travel | 27.1 (214)             | 39.9 (657)          |
| Wanting to do my part to achieve "herd immunity"                                                           | 35.5 (283)             | 64.8 (1114)         |
| Getting a recommendation from my employer to get the booster                                               | 17.7 (112)             | 20.7 (202)          |
| Getting the booster according to the recommended schedule                                                  | 25.9 (200)             | 52.2 (888)          |
| Believing that getting the booster would reduce my worries and anxiety                                     | 21.9 (172)             | 42.9 (725)          |
| Getting a recommendation from my doctor to get the booster                                                 | 21.5 (155)             | 31.9 (425)          |
| The convenience of getting the booster                                                                     | 28.3 (224)             | 44.5 (755)          |
| Knowing that getting the booster will help protect others around me                                        | 39.2 (319)             | 69.7 (1198)         |
| Having information that the booster is effective against new COVID-19 strains or variants                  | 41.0 (332)             | 60.7 (1038)         |
| Having a choice about which booster I get                                                                  | 35.3 (279)             | 31.3 (508)          |
| Getting clear and consistent booster information from my government                                        | 34.9 (279)             | 47.2 (800)          |

**Supplementary Table S3.** Participants motivators as a function of booster vaccination status

| Motivators                                                                                                 | Boosted<br>(Reference : not boosted) |                       |      | p-value         |
|------------------------------------------------------------------------------------------------------------|--------------------------------------|-----------------------|------|-----------------|
|                                                                                                            | OR                                   | 95% CI<br>Lower Upper |      |                 |
| Trusting the company who developed the booster                                                             | 1.17                                 | 0.93                  | 1.46 | 0.183           |
| Having information that the booster is safe and unlikely to have any serious short-term side effects       | <b>1.40</b>                          | 1.13                  | 1.73 | <b>0.002</b>    |
| Having information that the booster is safe and unlikely to have any serious long-term side effects        | <b>1.35</b>                          | 1.09                  | 1.67 | <b>0.007</b>    |
| Having information that the booster is effective                                                           | <b>1.78</b>                          | 1.43                  | 2.21 | <b>&lt;.001</b> |
| Believing that I am high risk of getting infected with COVID-19                                            | 1.12                                 | 0.87                  | 1.45 | 0.372           |
| Hearing that other people have positive attitudes towards the booster                                      | <b>1.55</b>                          | 1.20                  | 2.00 | <b>0.001</b>    |
| Seeing more people getting the booster                                                                     | <b>1.65</b>                          | 1.28                  | 2.14 | <b>0.001</b>    |
| Learning that getting the booster would allow me to go to restaurants/bars, attend public events or travel | <b>1.55</b>                          | 1.23                  | 1.94 | <b>0.001</b>    |
| Wanting to do my part to achieve "herd immunity"                                                           | <b>3.27</b>                          | 2.62                  | 4.07 | <b>&lt;.001</b> |
| Getting a recommendation from my employer to get the booster                                               | 0.94                                 | 0.69                  | 1.28 | 0.708           |
| Getting the booster according to the recommended schedule                                                  | <b>2.53</b>                          | 2.00                  | 3.20 | <b>&lt;.001</b> |
| Believing that getting the booster would reduce my worries and anxiety                                     | <b>2.08</b>                          | 1.63                  | 2.65 | <b>&lt;.001</b> |
| Getting a recommendation from my doctor to get the booster                                                 | <b>1.59</b>                          | 1.22                  | 2.07 | <b>0.001</b>    |
| The convenience of getting the booster                                                                     | <b>1.66</b>                          | 1.33                  | 2.08 | <b>&lt;.001</b> |
| Knowing that getting the booster will help protect others around me                                        | <b>3.11</b>                          | 2.50                  | 3.87 | <b>&lt;.001</b> |
| Having information that the booster is effective against new COVID-19 strains or variants                  | <b>1.80</b>                          | 1.45                  | 2.24 | <b>&lt;.001</b> |
| Having a choice about which booster I get                                                                  | <b>0.67</b>                          | 0.53                  | 0.84 | <b>0.001</b>    |

|                                                                     |             |      |      |              |
|---------------------------------------------------------------------|-------------|------|------|--------------|
| Getting clear and consistent booster information from my government | <b>1.40</b> | 1.13 | 1.74 | <b>0.002</b> |
|---------------------------------------------------------------------|-------------|------|------|--------------|

OR: Odds ratio, CI: Confidence Interval

Adjusted for: sex, age, education, income, having a chronic disease or mental disorder, being parent, being a healthcare or essential workers, COVID-19 infection, and weighting
